# Supplementary material
Source: MDPI journal article supplement (https://www.mdpi.com/2073-4468/9/2/16)
Supplement: s1 [file s1]

# Supporting Information

## A Purification Strategy Utilizing Hydrophobic Interaction Chromatography to Obtain Homogeneous Species from a Site-Specific Antibody Drug Conjugate Produced by AJICAP™ First Generation

Yutaka Matsuda,<sup>1</sup> Monica Leung,<sup>1</sup> Tatsuya Okuzumi,<sup>2</sup> Brian A. Mendelsohn<sup>\*1</sup>

\* Corresponding author.

**1: Ajinomoto Bio-Pharma Services, 11040 Roselle Street, San Diego, CA 92121, United States.**

**2: Ajinomoto Co., Inc., 1-1 Suzuki-cho, Kawasaki, Kanagawa 210-8681, Japan.**

Corresponding Author E-mail Address: [Brian.Mendelsohn@US.AjiBio-Pharma.com](mailto:Brian.Mendelsohn@US.AjiBio-Pharma.com)

|                                            |      |
|--------------------------------------------|------|
| Full length chromatograms HIC-HPLC .....   | S-2  |
| DAR calculator results from Q-TOF MS ..... | S-6  |
| Full length chromatograms RP-HPLC .....    | S-8  |
| Full length chromatograms SEC-HPLC .....   | S-12 |

## Full length chromatograms HIC-HPLC

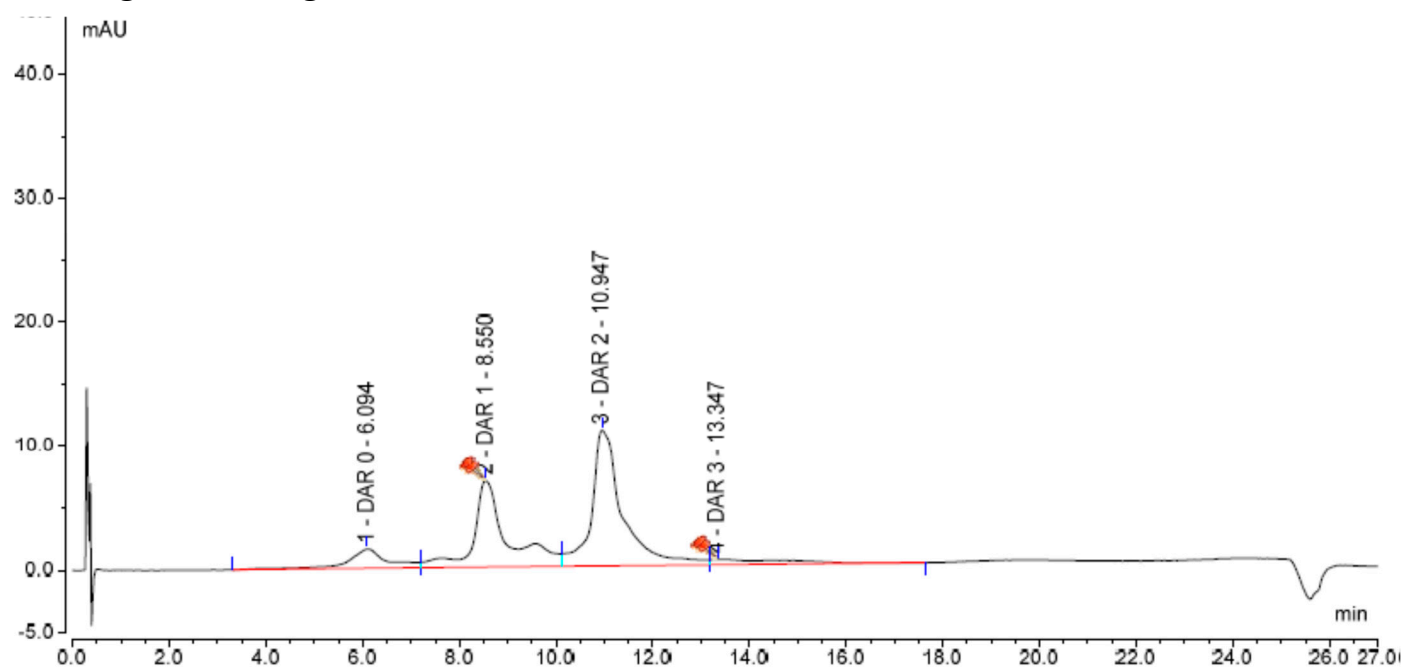

| No          | Peak time | retention time | Drug load | Relative area % | Weighted peak area |
|-------------|-----------|----------------|-----------|-----------------|--------------------|
| 1           | DAR = 0   | 6.09           | 0         | 8.28            | 0                  |
| 2           | DAR = 1   | 8.55           | 1         | 34.01           | 34.01              |
| 3           | DAR = 2   | 10.95          | 2         | 51.03           | 102.06             |
| 4           | DAR = 3   | 13.35          | 3         | 6.68            | 20.04              |
| Average DAR |           |                |           |                 | 1.6                |

Figure S1. Full length results of unpurified trastuzumab-AJICAP™-MMAE (4)

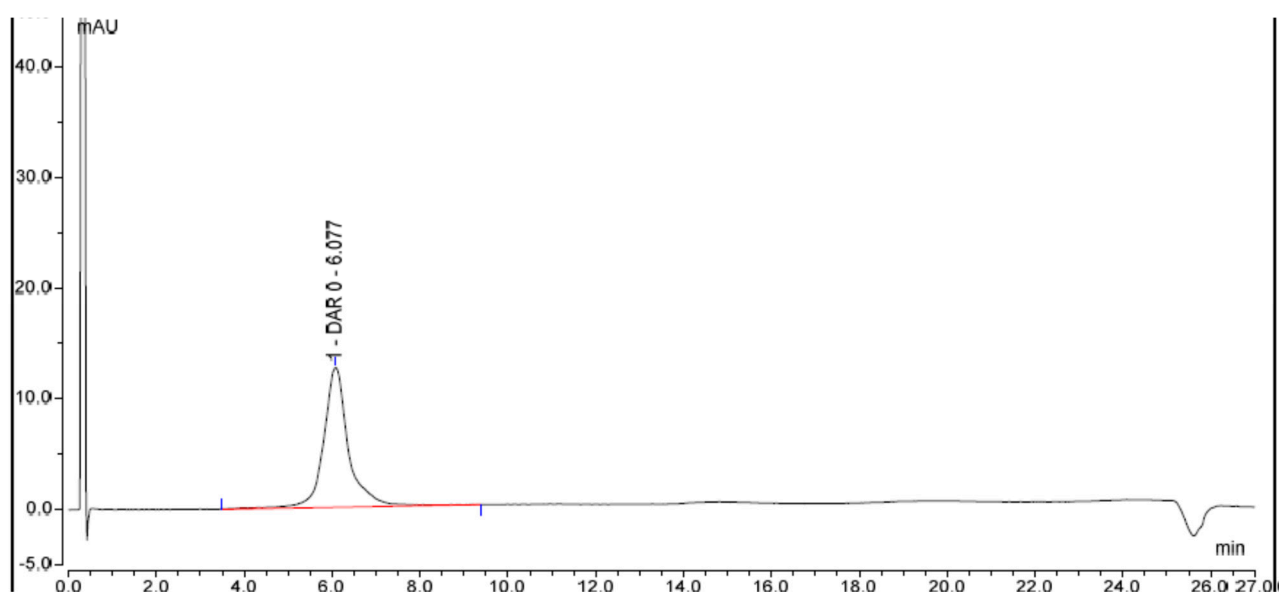

| No          | Peak time | retention time | Drug load | Relative area % | Weighted peak area |
|-------------|-----------|----------------|-----------|-----------------|--------------------|
| 1           | DAR = 0   | 6.08           | 0         | 100             | 0                  |
| Average DAR |           |                |           |                 | 0.0                |

Figure S2. Full length results of unpurified trastuzumab-AJICAP™-MMAE (**DAR = 0**)

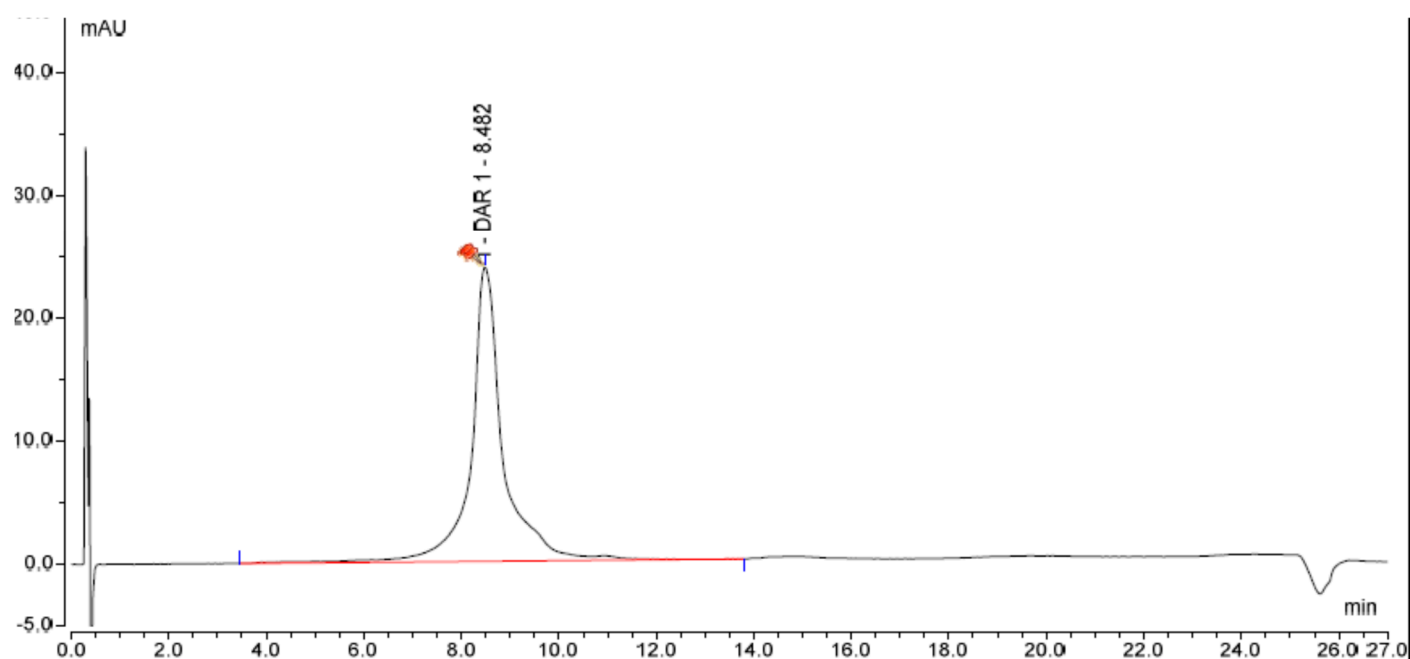

| No          | Peak time | retention time | Drug load | Relative area % | Weighted peak area |
|-------------|-----------|----------------|-----------|-----------------|--------------------|
| 1           | DAR = 1   | 8.48           | 1         | 100             | 1                  |
| Average DAR |           |                |           |                 | 1.0                |

Figure S3. Full length results of unpurified trastuzumab-AJICAP™-MMAE (**DAR = 1**)

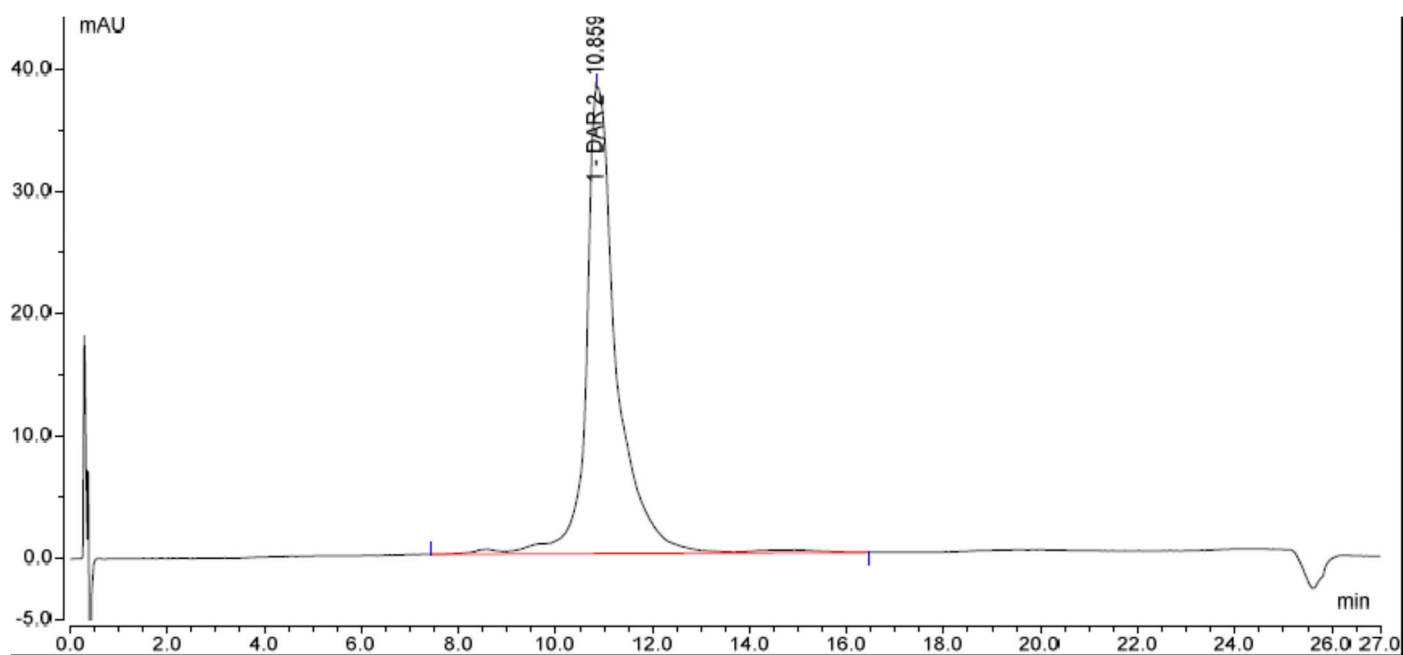

| No          | Peak time | retention time | Drug load | Relative area % | Weighted peak area |
|-------------|-----------|----------------|-----------|-----------------|--------------------|
| 1           | DAR = 2   | 10.86          | 2         | 100             | 2                  |
| Average DAR |           |                |           |                 | 2.0                |

Figure S4. Full length results of unpurified trastuzumab-AJICAP™-MMAE (**DAR = 2**)

DAR calculation results from Q-TOF MS

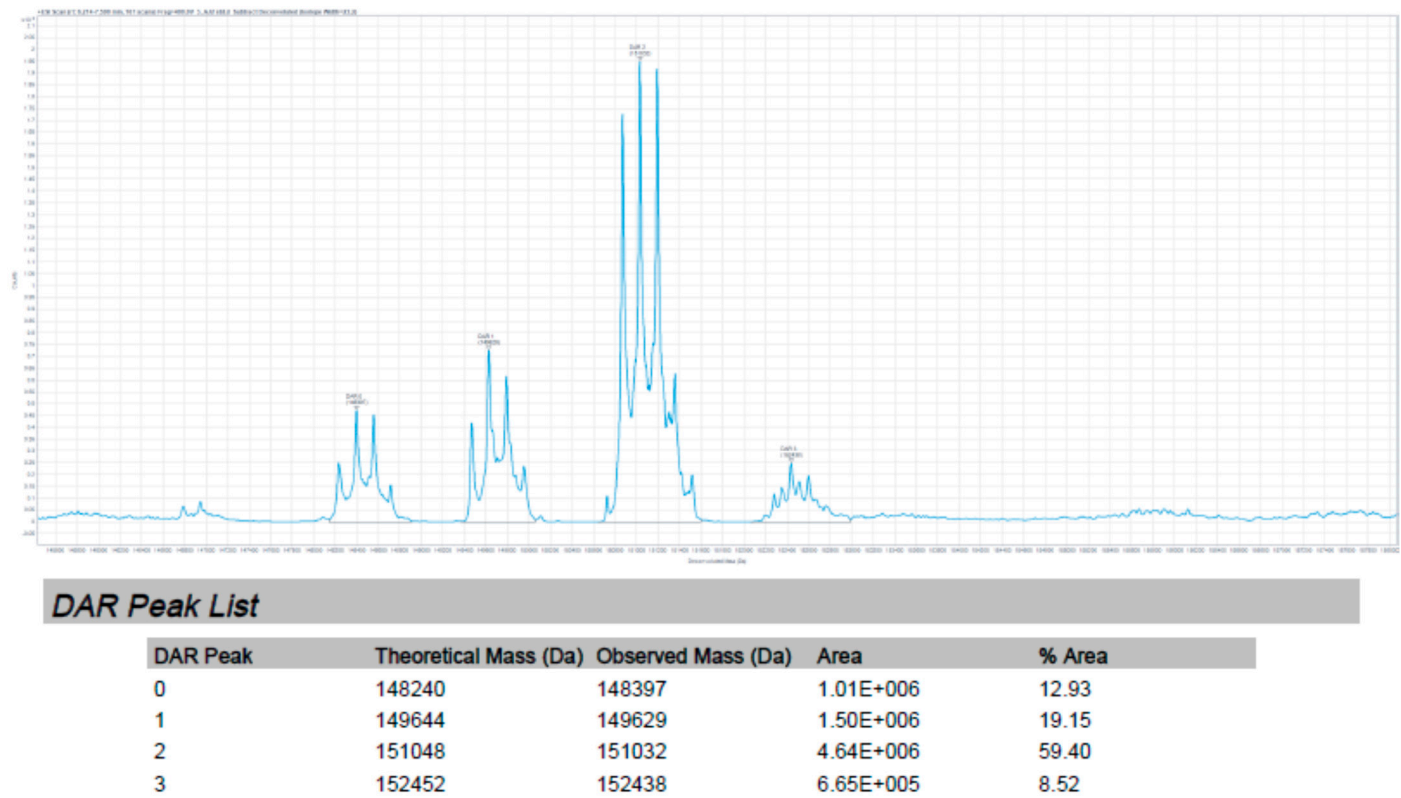

Figure S5 Deconvoluted spectra of unpurified trastuzumab-AJICAP™-MMAE (4)

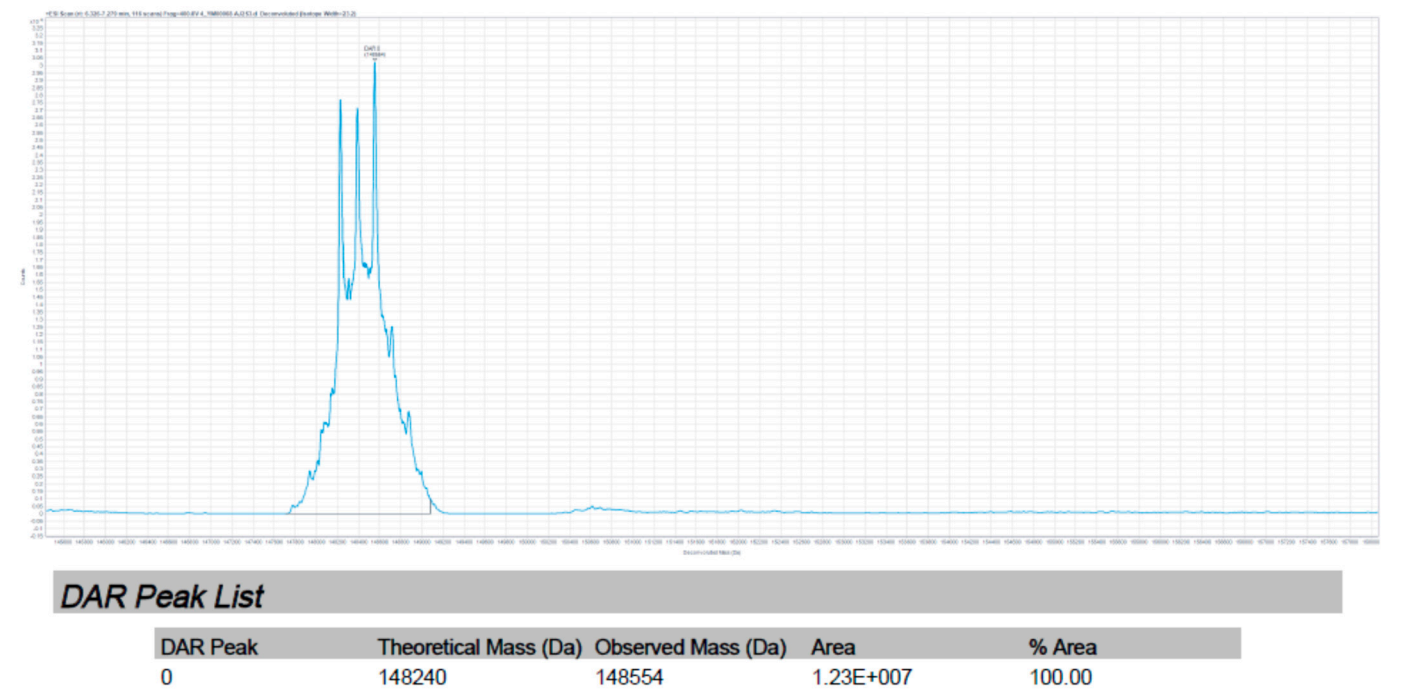

Figure S6 Deconvoluted spectra of trastuzumab-AJICAP™-MMAE (DAR = 0)

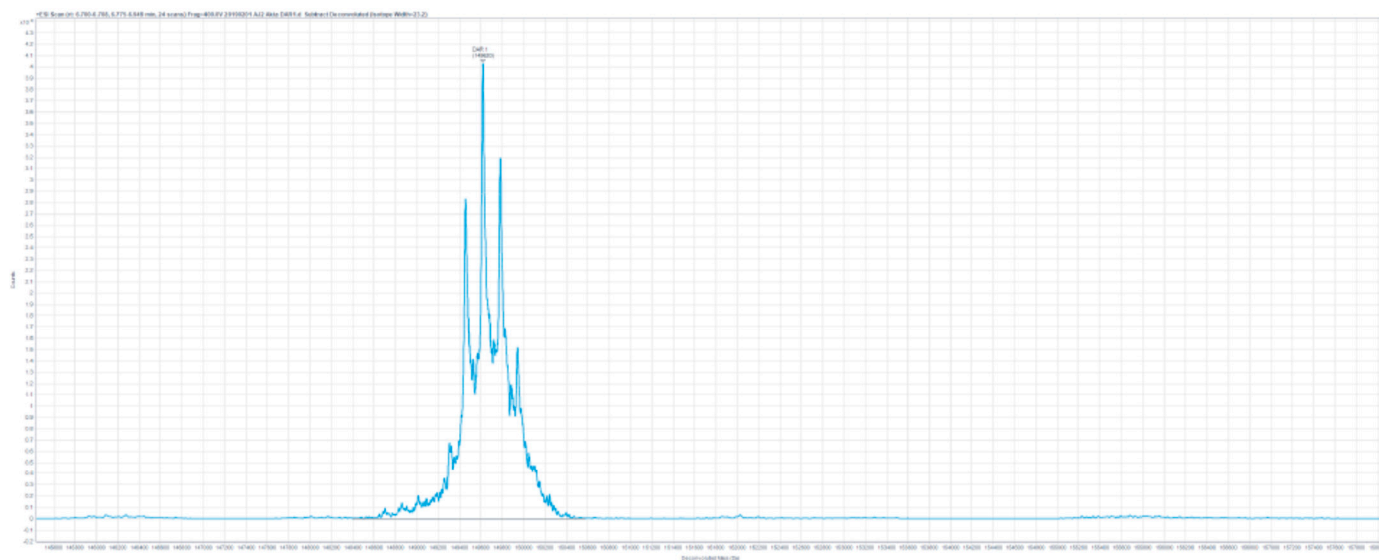

### DAR Peak List

| DAR Peak | Theoretical Mass (Da) | Observed Mass (Da) | Area      | % Area |
|----------|-----------------------|--------------------|-----------|--------|
| 1        | 149644                | 149620             | 1.22E+007 | 100.00 |

Figure S7 Deconvoluted spectra of trastuzumab-AJICAP™-MMAE (**DAR = 1**)

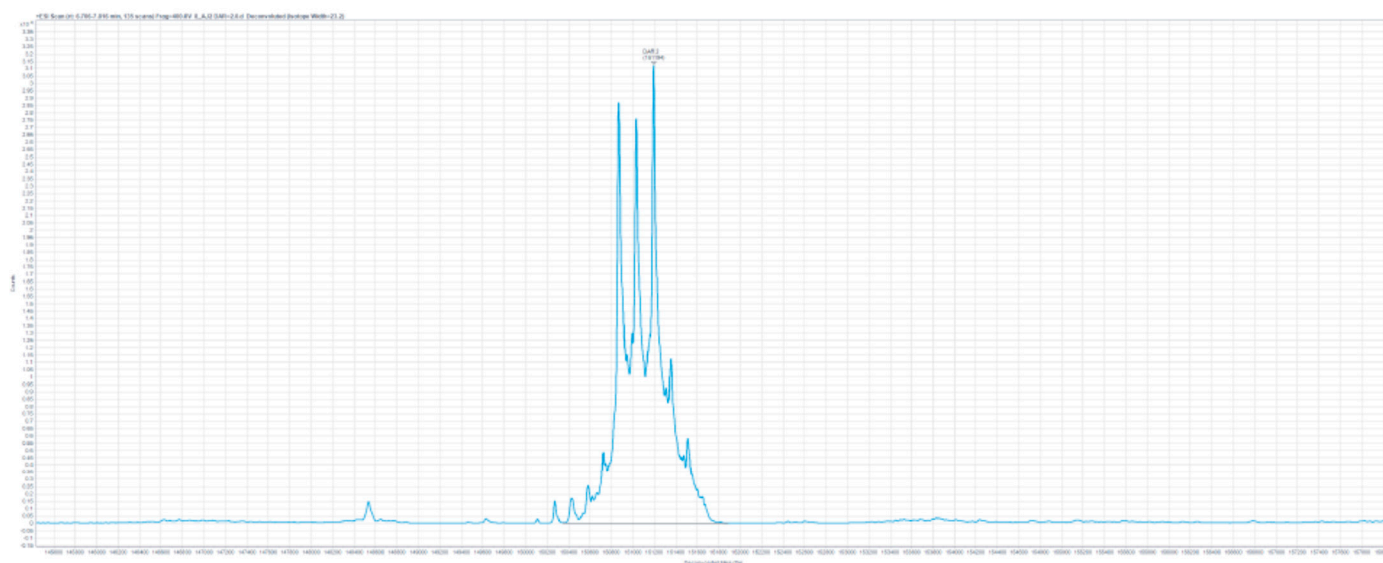

### DAR Peak List

| DAR Peak | Theoretical Mass (Da) | Observed Mass (Da) | Area      | % Area |
|----------|-----------------------|--------------------|-----------|--------|
| 2        | 151048                | 151194             | 9.99E+006 | 100.00 |

Figure S8 Deconvoluted spectra of trastuzumab-AJICAP™-MMAE (**DAR = 2**)

## Full length chromatograms RP-HPLC

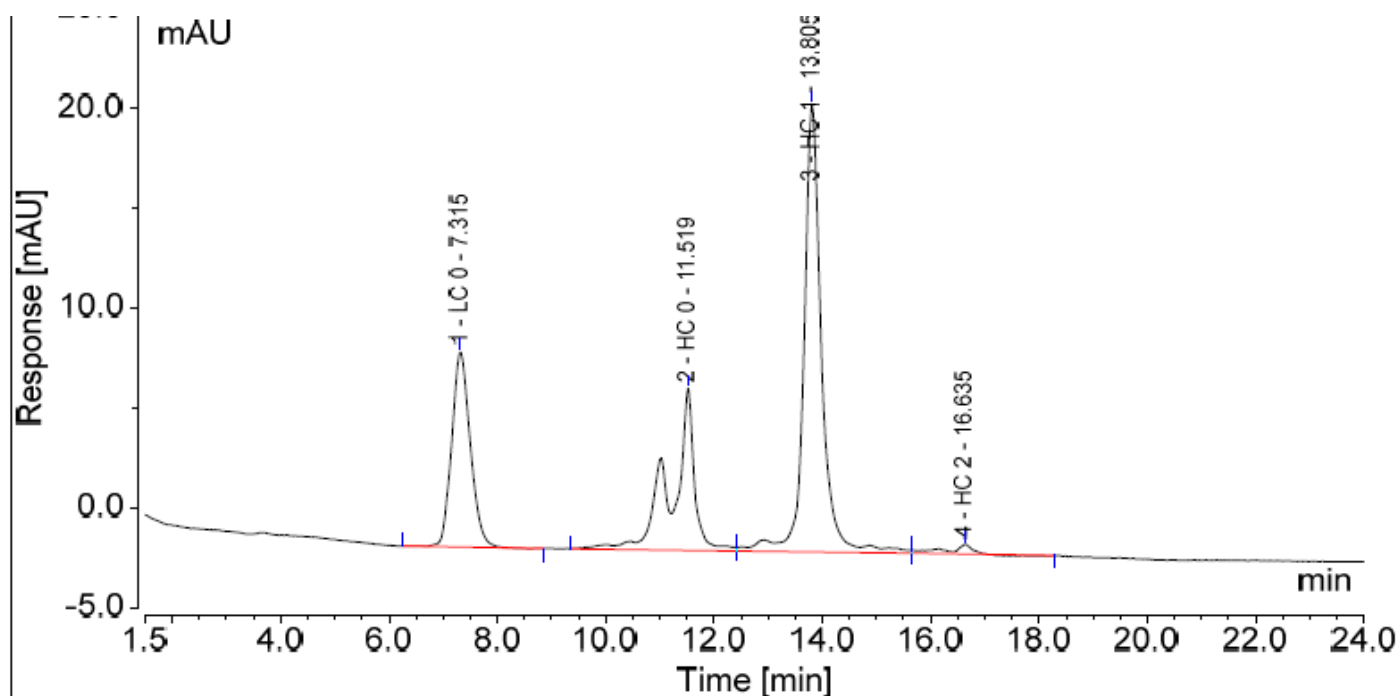

| No | Peak time | retention time | Drug load | Relative area % | Weighted peak area |
|----|-----------|----------------|-----------|-----------------|--------------------|
| 1  | LC 0      | 7.32           | 0         | 100             | 0                  |
| 2  | HC 0      | 11.52          | 0         | 28.24           | 0                  |
| 3  | HC 1      | 13.81          | 1         | 70.1            | 70.1               |
| 4  | HC 2      | 16.64          | 2         | 2.66            | 5.32               |
|    |           |                |           | DAR             | 1.5                |

Figure S9 Full length results of unpurified trastuzumab-AJICAP™-MMAE (4); LC 0: light chain, HC 0: heavy chain, HC 1: heavy chain conjugated with one MMAE, HC 2: heavy chain conjugated with two MMAEs



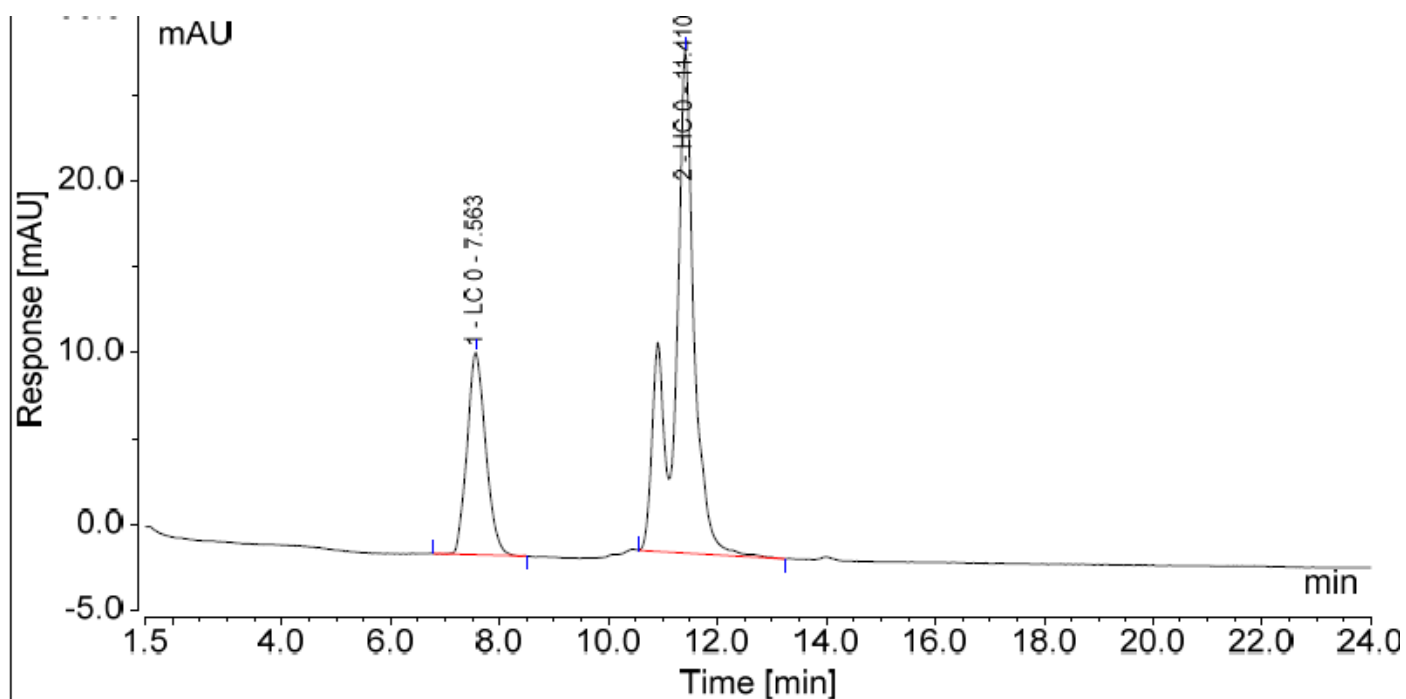

| No  | Peak time | retention time | Drug load | Relative area % | Weighted peak area |
|-----|-----------|----------------|-----------|-----------------|--------------------|
| 1   | LC 0      | 7.57           | 0         | 100             | 0                  |
| 2   | HC 0      | 11.41          | 0         | 100             | 0                  |
| DAR |           |                |           |                 | 0.0                |

Figure S10 Full length results of trastuzumab-AJICAP™-MMAE (**DAR = 0**), LC 0: light chain, HC 0: heavy chain

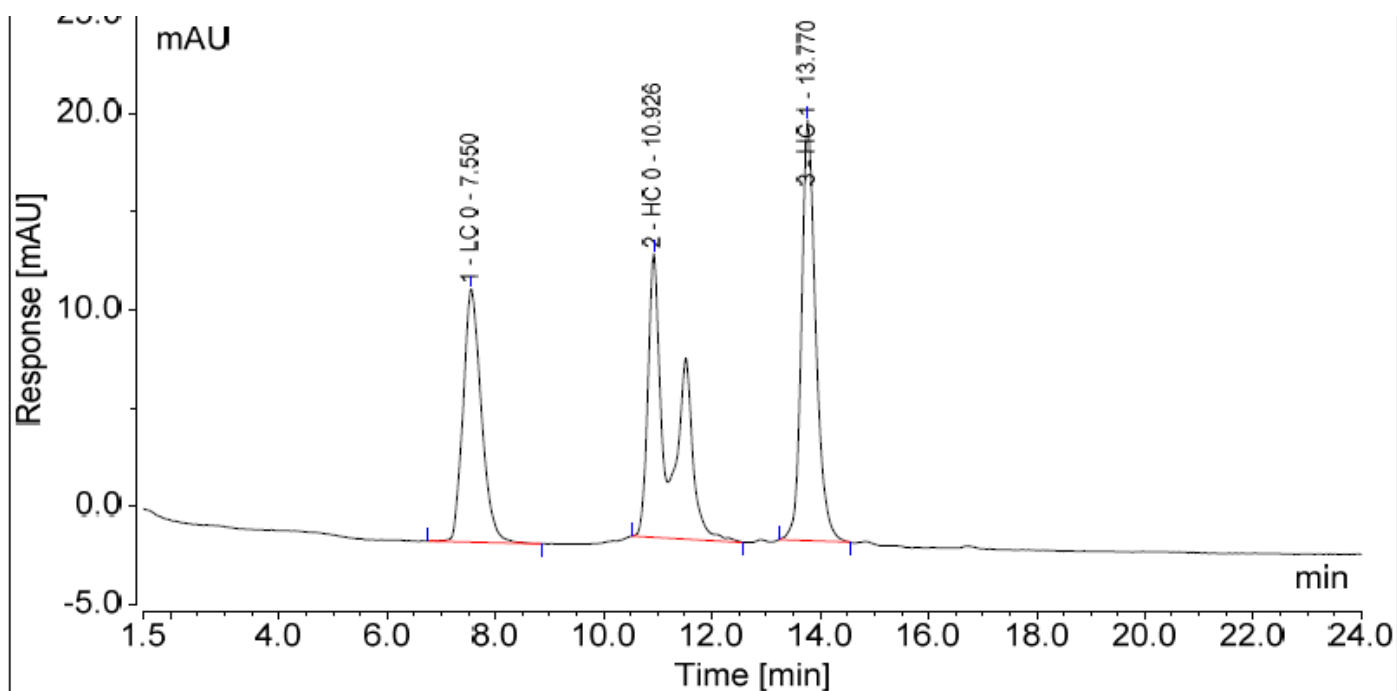

| No  | Peak time | retention time | Drug load | Relative area % | Weighted peak area |
|-----|-----------|----------------|-----------|-----------------|--------------------|
| 1   | LC 0      | 7.55           | 0         | 100             | 0                  |
| 2   | HC 0      | 10.93          | 0         | 51.14           | 0                  |
| 3   | HC 1      | 13.77          | 1         | 48.86           | 48.86              |
| DAR |           |                |           |                 | 0.98               |

Figure S11 Full length results of trastuzumab-AJICAP™-MMAE (**DAR = 1**) LC 0: light chain, HC 0: heavy chain, HC 1: heavy chain conjugated with one MMAE

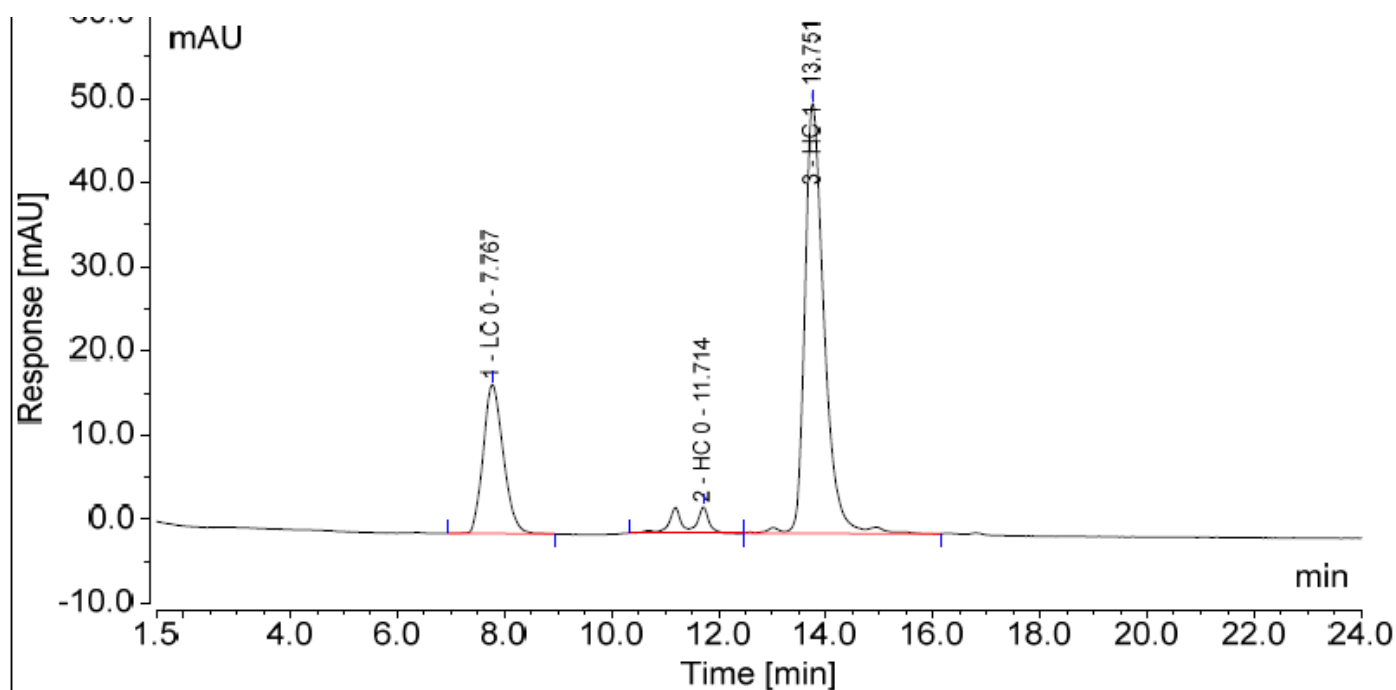

| No  | Peak time | retention time | Drug load | Relative area % | Weighted peak area |
|-----|-----------|----------------|-----------|-----------------|--------------------|
| 1   | LC 0      | 7.76           | 0         | 100             | 0                  |
| 2   | HC 0      | 11.71          | 0         | 6.79            | 0                  |
| 3   | HC 1      | 13.75          | 1         | 93.21           | 93.21              |
| DAR |           |                |           |                 | 1.9                |

Figure S12 Full length results of trastuzumab-AJICAP™-MMAE (**DAR = 2**); LC 0: light chain, HC 0: heavy chain, HC 1: heavy chain conjugated with one MMAE

## Full length chromatograms SEC-HPLC

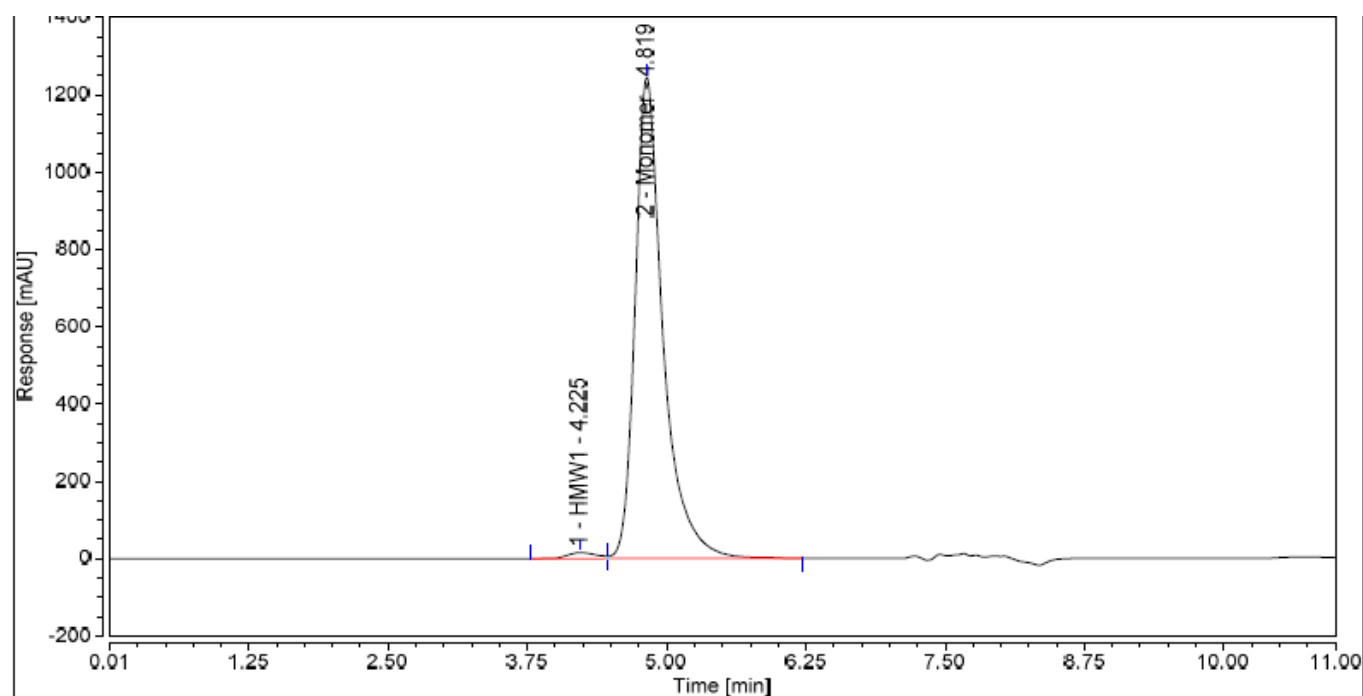

| No | Peak time | retention time | Relative area % |
|----|-----------|----------------|-----------------|
| 1  | HWE       | 4.22           | 1.79            |
| 2  | Monomer   | 4.82           | 98.2            |

| No | Peak time | retention time | Relative area % |
|----|-----------|----------------|-----------------|
| 1  | HWE       | 4.22           | 1.79            |
| 2  | Monomer   | 4.82           | 98.2            |

Figure S13. Full length results of trastuzumab-AJICAP™-MMAE (**DAR = 1**)

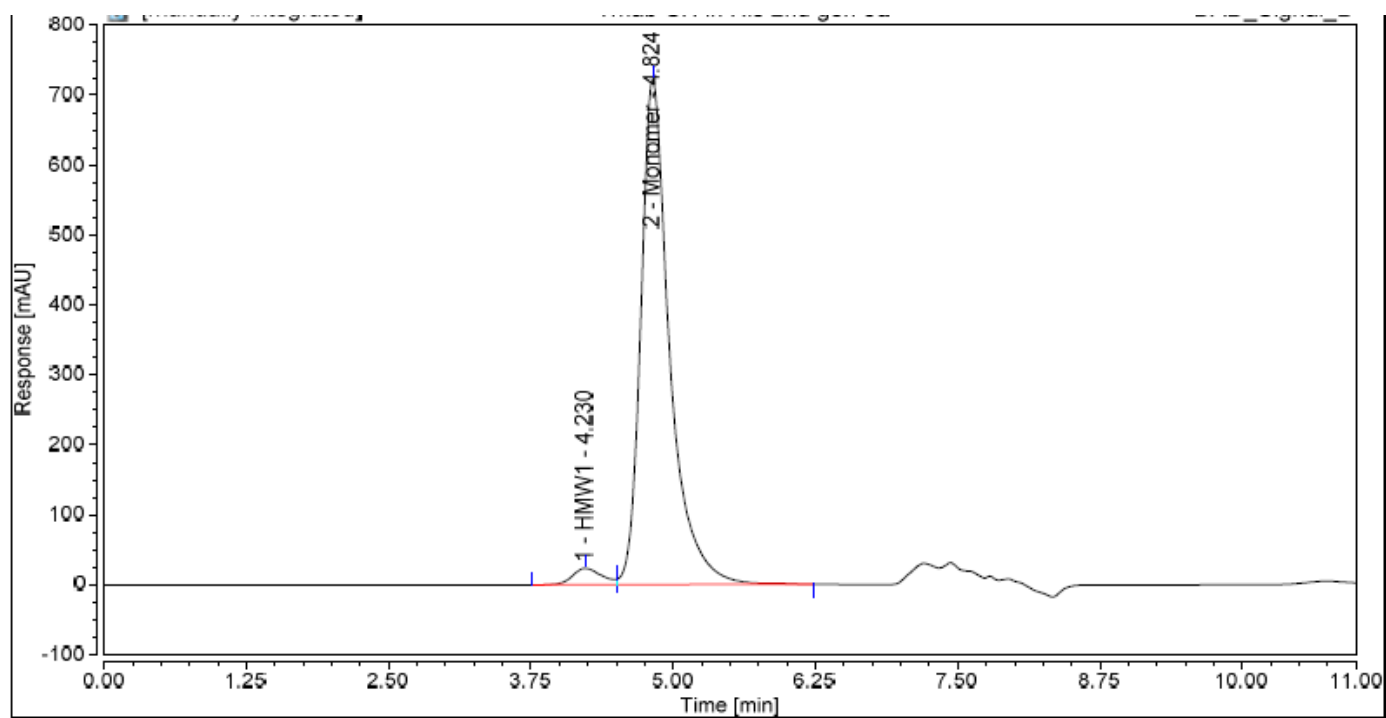

| No | Peak time | retention time | Relative area % |
|----|-----------|----------------|-----------------|
| 1  | HWE       | 4.22           | 3.40            |
| 2  | Monomer   | 4.82           | 96.6            |

Figure S14. Full length results of trastuzumab-AJICAP™-MMAE (**DAR = 2**)
